# Supplementary material for: Characterization and Protective Properties of Lactic Acid Bacteria Intended to Be Used in Probiotic Preparation for Honeybees (Apis mellifera L.)—An In Vitro Study
Source: MDPI journal article supplement (doi:10.3390/ani13061059), 2023-03-15
Supplement: s1 [file s1]

# Characterization and Protective Properties of Lactic Acid Bacteria Intended to Be Used in Probiotic Preparation for Honeybees (*Apis mellifera* L.)—An In Vitro Study

Aleksandra Leska, Adriana Nowak, Justyna Rosicka-Kaczmarek, Małgorzata Ryngajłło, Karolina Henryka Czarnecka-Chrebelska

**Table S2.** Survival of lactic acid bacteria (LAB) strains in sugar syrups A, B, and C after 24 and 48 h of incubation. Results are presented as mean  $\pm$  standard deviation (SD), and all values were divided by  $10^7$  in order to simplify the table. Differences regarding the survival of LAB strains in sugar syrups were tested using the Kruskal–Wallis test (KWW test), followed by a multiple comparison test (MCT) to indicate significant differences between the groups at  $p < 0.05$ . Statistical differences in the survival of the LAB strains are indicated with letters: <sub>A,B</sub> indicating the groups with a statistical difference.

| LAB strain                  | Control             |                     |                                   | Syrup A           |                              | Syrup B           |                              | Syrup C           |                              | <i>p</i> -value<br>KWW test                                     |
|-----------------------------|---------------------|---------------------|-----------------------------------|-------------------|------------------------------|-------------------|------------------------------|-------------------|------------------------------|-----------------------------------------------------------------|
|                             | 0h                  | 24h                 | 48h                               | 24h               | 48h                          | 24h               | 48h                          | 24h               | 48h                          |                                                                 |
| <i>A. kunkeei</i> DSM 12361 | 88.87 $\pm$ 48.09   | 305.25 $\pm$ 57.19  | 71.13 $\pm$ 25.07 <sup>A</sup>    | 58.53 $\pm$ 21.09 | 4.70 $\pm$ 1.78              | 34.50 $\pm$ 13.46 | 0.75 $\pm$ 0.30 <sup>A</sup> | 62.25 $\pm$ 15.76 | 38.25 $\pm$ 4.86             | <i>p</i> =0.002                                                 |
| <i>P. acidilactici</i> 18/1 | 55.37 $\pm$ 69.77   | 214.00 $\pm$ 82.93  | 103.43 $\pm$ 45.57 <sup>A</sup>   | 2.53 $\pm$ 1.67   | 0.16 $\pm$ 0.05 <sup>A</sup> | 21.38 $\pm$ 12.88 | 0.24 $\pm$ 0.05              | 10.78 $\pm$ 6.42  | 0.22 $\pm$ 0.11              | <i>p</i> =0.026                                                 |
| <i>P. acidilactici</i> 21/1 | 65.08 $\pm$ 77.89   | 207.48 $\pm$ 129.24 | 35.18 $\pm$ 8.00 <sup>A,B</sup>   | 30.45 $\pm$ 30.88 | 0.16 $\pm$ 0.05 <sup>A</sup> | 53.40 $\pm$ 25.34 | 0.69 $\pm$ 0.01 <sup>B</sup> | 2.29 $\pm$ 1.90   | 0.97 $\pm$ 0.31              | <i>p</i> <sup>A</sup> =0.008;<br><i>p</i> <sup>B</sup> =0.023   |
| <i>P. pentosaceus</i> 25/1  | 43.30 $\pm$ 30.66   | 133.50 $\pm$ 24.75  | 110.10 $\pm$ 25.49 <sup>A</sup>   | 4.70 $\pm$ 0.85   | 1.10 $\pm$ 0.27              | 18.20 $\pm$ 4.10  | 0.81 $\pm$ 0.25 <sup>A</sup> | 28.00 $\pm$ 21.95 | 13.10 $\pm$ 8.01             | <i>p</i> = 0.013                                                |
| <i>P. pentosaceus</i> 5/2   | 132.12 $\pm$ 32.15  | 536.00 $\pm$ 177.04 | 213.75 $\pm$ 13.77 <sup>A,B</sup> | 55.03 $\pm$ 5.59  | 6.75 $\pm$ 0.99 <sup>A</sup> | 56.73 $\pm$ 3.93  | 6.75 $\pm$ 0.99 <sup>B</sup> | 32.28 $\pm$ 4.53  | 12.05 $\pm$ 1.91             | <i>p</i> <sup>A</sup> =0.0178;<br><i>p</i> <sup>B</sup> =0.0178 |
| <i>P. pentosaceus</i> 7/1   | 194.16 $\pm$ 104.55 | 775.50 $\pm$ 108.33 | 474.75 $\pm$ 51.17 <sup>A</sup>   | 33.70 $\pm$ 5.53  | 8.15 $\pm$ 0.62              | 51.43 $\pm$ 6.89  | 8.15 $\pm$ 0.62              | 47.23 $\pm$ 6.77  | 4.25 $\pm$ 2.18 <sup>A</sup> | <i>p</i> =0.002                                                 |
| <i>P. pentosaceus</i> OK-S  | 76.32 $\pm$ 21.89   | 368.00 $\pm$ 39.19  | 3.60 $\pm$ 1.82                   | 12.10 $\pm$ 9.42  | 0.98 $\pm$ 0.68              | 24.60 $\pm$ 19.87 | 1.23 $\pm$ 0.26              | 1.23 $\pm$ 0.26   | 1.43 $\pm$ 1.10              | <i>p</i> >0.05                                                  |
| <i>P. acidilactici</i> 4/1  | 174.10 $\pm$ 315.59 | 696.25 $\pm$ 343.71 | 208.00 $\pm$ 100.66 <sup>A</sup>  | 7.23 $\pm$ 2.12   | 3.43 $\pm$ 2.81              | 23.00 $\pm$ 22.08 | 1.03 $\pm$ 0.05 <sup>A</sup> | 38.08 $\pm$ 4.17  | 5.65 $\pm$ 1.91              | <i>p</i> =0.008                                                 |
| <i>P. acidilactici</i> 11/3 | 176.06 $\pm$ 59.46  | 771.25 $\pm$ 182.53 | 533.00 $\pm$ 93.75 <sup>A</sup>   | 25.03 $\pm$ 12.00 | 24.83 $\pm$ 27.05            | 41.10 $\pm$ 7.79  | 1.03 $\pm$ 0.05 <sup>A</sup> | 35.60 $\pm$ 9.97  | 11.00 $\pm$ 2.93             | <i>p</i> =0.004                                                 |
| <i>P. pentosaceus</i> 14/1  | 176.23 $\pm$ 119.20 | 457.50 $\pm$ 71.36  | 438.25 $\pm$ 57.31 <sup>A</sup>   | 82.00 $\pm$ 13.98 | 27.80 $\pm$ 17.29            | 45.28 $\pm$ 29.79 | 3.40 $\pm$ 0.78 <sup>A</sup> | 47.23 $\pm$ 8.81  | 11.15 $\pm$ 2.69             | <i>p</i> =0.002                                                 |
| <i>L. casei</i> 12AN        | 209.05 $\pm$ 37.93  | 918.75 $\pm$ 94.11  | 464.25 $\pm$ 149.29 <sup>A</sup>  | 48.50 $\pm$ 33.97 | 53.13 $\pm$ 9.26             | 50.18 $\pm$ 2.21  | 4.78 $\pm$ 1.53 <sup>A</sup> | 67.40 $\pm$ 14.15 | 22.95 $\pm$ 2.89             | <i>p</i> =0.002                                                 |
