# Supplementary material for: Characterization and Protective Properties of Lactic Acid Bacteria Intended to Be Used in Probiotic Preparation for Honeybees (Apis mellifera L.)—An In Vitro Study
Source: MDPI journal article supplement (doi:10.3390/ani13061059), 2023-03-15
Supplement: s1 [file s1]

# Characterization and Protective Properties of Lactic Acid Bacteria Intended to Be Used in Probiotic Preparation for Honeybees (*Apis mellifera* L.) – An In Vitro Study

Aleksandra Leska, Adriana Nowak, Justyna Rosicka-Kaczmarek, Małgorzata Ryngajło, Karolina Henryka Czarnecka-Chrebelska

**Table S1.** Survival of lactic acid bacteria (LAB) strains in the simulated digestive tract. Results are presented as mean cell viability  $\pm$  standard deviation (SD), all values were divided by  $10^6$  in order to simplify the table. LAB strains' survival was compared to the *A. kunkeei* DSM 12361 using the Independent Samples t Tests. Significant differences in the LAB strains' survival compared to the reference strain are indicated with colors and letters (only for the differences in the gastric juice).

| LAB strain                  | Control 0h                                                               | Control 2h            | Control 4h                                                               | Incubation in the gastric juice   | Incubation in the intestinal juice |
|-----------------------------|--------------------------------------------------------------------------|-----------------------|--------------------------------------------------------------------------|-----------------------------------|------------------------------------|
| <i>A. kunkeei</i> DSM 12361 | 1422.50 $\pm$ 167.41                                                     | 1335.00 $\pm$ 292.18  | 1605.00 $\pm$ 188.06                                                     | 728.25 $\pm$ 99.85                | 1.10 $\pm$ 0.85                    |
| <i>P. acidilactici</i> 4/1  | 2775.00 $\pm$ 503.42                                                     | 1832.50 $\pm$ 306.74  | 1932.50 $\pm$ 455.59                                                     | 47.50 $\pm$ 4.95 <sup>A</sup>     | 0.30 $\pm$ 0.03                    |
| <i>P. pentosaceus</i> 5/2   | 1152.50 $\pm$ 371.07                                                     | 1910.00 $\pm$ 461.23  | 1650.00 $\pm$ 84.85                                                      | 39.00 $\pm$ 1.41 <sup>B</sup>     | 3.00 $\pm$ 0                       |
| <i>P. acidilactici</i> 18/1 | 535.00 $\pm$ 259.42                                                      | 457.50 $\pm$ 251.45   | 432.50 $\pm$ 250.52                                                      | 6.00 $\pm$ 1.41 <sup>C</sup>      | 0.89 $\pm$ 0.18                    |
| <i>P. acidilactici</i> 21/1 | 1060.00 $\pm$ 718.70                                                     | 1247.50 $\pm$ 231.71  | 5537.50 $\pm$ 2384.68                                                    | 763.00 $\pm$ 114.49               | 3.87 $\pm$ 1.63                    |
| <i>P. pentosaceus</i> 25/1  | 365.00 $\pm$ 173.11                                                      | 290.00 $\pm$ 103.60   | 1447.50 $\pm$ 147.28                                                     | 238.75 $\pm$ 134.81 <sup>D</sup>  | 1.07 $\pm$ 0.90                    |
| <i>P. pentosaceus</i> 7/1   | 1965.00 $\pm$ 351.99                                                     | 2545.00 $\pm$ 197.40  | 2720.00 $\pm$ 129.61                                                     | 875.00 $\pm$ 123.87               | 0.87 $\pm$ 0.84                    |
| <i>P. acidilactici</i> 11/3 | 1535.00 $\pm$ 283.84                                                     | 4380.00 $\pm$ 1683.71 | 4257.50 $\pm$ 1349.48                                                    | 1450.00 $\pm$ 578.79 <sup>E</sup> | 0.01 $\pm$ 0.01                    |
| <i>P. pentosaceus</i> 14/1  | 2172.50 $\pm$ 409.66                                                     | 2937.50 $\pm$ 260.82  | 2880.00 $\pm$ 165.93                                                     | 705.25 $\pm$ 82.32                | 0.68 $\pm$ 0.38                    |
| <i>P. pentosaceus</i> OK-S  | 485.00 $\pm$ 193.30                                                      | 407.50 $\pm$ 86.17    | 650.00 $\pm$ 47.61                                                       | 374.75 $\pm$ 221.96 <sup>F</sup>  | 0.61 $\pm$ 0.46                    |
| <i>L. casei</i> 12AN        | 905.00 $\pm$ 188.06                                                      | 2062.50 $\pm$ 455.95  | 2390.00 $\pm$ 143.99                                                     | 530.25 $\pm$ 47.54 <sup>G</sup>   | 3.49 $\pm$ 3.69                    |
| Legend:                     | statistically increased in comparison to the <i>A. kunkeei</i> DSM 12361 |                       | statistically decreased in comparison to the <i>A. kunkeei</i> DSM 12361 |                                   |                                    |

<sup>A</sup>  $p=0.0008$ , <sup>B</sup>  $p=0.0007$ , <sup>C</sup>  $p=0.0006$ , <sup>D</sup>  $p=0.001$ , <sup>E</sup>  $p=0.049$ , <sup>F</sup>  $p=0.027$ , <sup>G</sup>  $p=0.011$ , Independent Samples t Tests
