# Supplementary material for: Characterization and Protective Properties of Lactic Acid Bacteria Intended to Be Used in Probiotic Preparation for Honeybees (Apis mellifera L.)—An In Vitro Study
Source: MDPI journal article supplement (doi:10.3390/ani13061059), 2023-03-15
Supplement: s1 [file s1]

# Characterization and Protective Properties of Lactic Acid Bacteria Intended to Be Used in Probiotic Preparation for Honeybees (*Apis mellifera* L.)—An In Vitro Study

Aleksandra Leska, Adriana Nowak, Justyna Rosicka-Kaczmarek, Małgorzata Ryngajłło, Karolina Henryka Czarnecka-Chrebelska

**Table S3.** Impact of the cell-free culture supernatants (CFS) from lactic acid bacteria (LAB) strains on the viability of Caco-2 cells. Results are presented as mean (from 8 measurements)  $\pm$  standard deviation (SD). The effect of CFS on Caco-2 cell survival rate has been tested using the Kruskal–Wallis test (KW test), followed by a multiple comparison test (MCT) to indicate significant differences between the groups at  $p < 0.05$ ; significant differences are indicated with colors.

| LAB strain                  | Concentration of CFSs                                                 |                    |                                                                       |                   |
|-----------------------------|-----------------------------------------------------------------------|--------------------|-----------------------------------------------------------------------|-------------------|
|                             | 1%                                                                    | 5%                 | 10%                                                                   | 20%               |
| <i>A. kunkeei</i> DSM 12361 | 115.73 $\pm$ 7.75                                                     | 126.25 $\pm$ 13.72 | 114.53 $\pm$ 11.86                                                    | 78.72 $\pm$ 6.66  |
| <i>P. acidilactici</i> 4/1  | 93.28 $\pm$ 7.2                                                       | 97.91 $\pm$ 10.03  | 94.39 $\pm$ 7.12                                                      | 34.91 $\pm$ 10.46 |
| <i>P. pentosaceus</i> 5/2   | 103.44 $\pm$ 9.44                                                     | 109.3 $\pm$ 9.72   | 124.42 $\pm$ 6.71                                                     | 89.81 $\pm$ 8.74  |
| <i>P. pentosaceus</i> 7/1   | 101.65 $\pm$ 6.89                                                     | 116.65 $\pm$ 4.69  | 100.24 $\pm$ 8.7                                                      | 45.80 $\pm$ 8.83  |
| <i>P. acidilactici</i> 11/3 | 105.68 $\pm$ 11.55                                                    | 108.71 $\pm$ 6.88  | 91.12 $\pm$ 15.5                                                      | 29.80 $\pm$ 8.12  |
| <i>P. pentosaceus</i> 14/1  | 97.5 $\pm$ 7.41                                                       | 112.16 $\pm$ 12.23 | 110.53 $\pm$ 10.05                                                    | 36.58 $\pm$ 5.89  |
| <i>P. acidilactici</i> 18/1 | 101.08 $\pm$ 8.81                                                     | 108 $\pm$ 7.86     | 94.49 $\pm$ 17.49                                                     | 30.26 $\pm$ 3.51  |
| <i>P. acidilactici</i> 21/1 | 102.28 $\pm$ 5.66                                                     | 109.54 $\pm$ 6.59  | 100.06 $\pm$ 9.62                                                     | 34.09 $\pm$ 3.08  |
| <i>P. pentosaceus</i> 25/1  | 102.73 $\pm$ 7.82                                                     | 101.47 $\pm$ 10.09 | 107.6 $\pm$ 7.38                                                      | 75.65 $\pm$ 15.12 |
| <i>L. casei</i> 12AN        | 164.53 $\pm$ 17.88                                                    | 144.41 $\pm$ 10.29 | 157.26 $\pm$ 24.8                                                     | 30.17 $\pm$ 3.48  |
| <i>P. pentosaceus</i> OK-S  | 97.48 $\pm$ 6.31                                                      | 95.7 $\pm$ 7.55    | 90.53 $\pm$ 20.46                                                     | 30.92 $\pm$ 5.05  |
| Legend:                     | significantly increased Caco-2 cells survival ( $p < 0.05$ . KW test) |                    | significantly decreased Caco-2 cells survival ( $p < 0.05$ . KW test) |                   |
