# Supplementary material for: Characterization and Protective Properties of Lactic Acid Bacteria Intended to Be Used in Probiotic Preparation for Honeybees (Apis mellifera L.)—An In Vitro Study
Source: MDPI journal article supplement (doi:10.3390/ani13061059), 2023-03-15
Supplement: s1 [file s1]

# Characterization and Protective Properties of Lactic Acid Bacteria Intended to Be Used in Probiotic Preparation for Honeybees (*Apis mellifera* L.)—An In Vitro Study

Aleksandra Leska, Adriana Nowak, Justyna Rosicka-Kaczmarek, Małgorzata Ryngajło, Karolina Henryka Czarnecka-Chrebelska

**Table 5** Ability of *P. pentosaceus* 14/1 cell-free supernatant (CFS) to protect Caco-2 cells against the cytotoxicity of insecticides. Results for viability are presented as mean  $\pm$  standard deviation (SD). The protective effect of CFS on Caco-2 cells against cytotoxicity has been tested using the Kruskal–Wallis test (KW test), followed by a multiple comparison test (MCT) to indicate significant differences between the groups at  $p < 0.05$ . Statistical differences are

|                                     | Chlorpyrifos<br>50 $\mu\text{g/mL}$ | Chlorpyrifos<br>25 $\mu\text{g/mL}$ | Coumaphos<br>25 $\mu\text{g/mL}$ | Coumaphos<br>12.5 $\mu\text{g/mL}$ |
|-------------------------------------|-------------------------------------|-------------------------------------|----------------------------------|------------------------------------|
| Without initial incubation with CFS | 65.83 $\pm$ 9.47                    | 61.63 $\pm$ 12.28                   | 45.95 $\pm$ 5.35*                | 60.5 $\pm$ 4.81                    |
| Incubation with 0.1 mg/mL CFS       | 61.21 $\pm$ 19.12                   | 60.45 $\pm$ 13.84                   | 58.09 $\pm$ 3.72                 | 63.45 $\pm$ 7.82                   |
| Incubation with 1.0 mg/mL CFS       | 68.61 $\pm$ 4.63                    | 64.00 $\pm$ 3.93                    | 63.18 $\pm$ 2.84                 | 79.82 $\pm$ 16.91*                 |

indicated with \* ( $p=0.003$ ).
