# Supplementary material for: Characterization and Protective Properties of Lactic Acid Bacteria Intended to Be Used in Probiotic Preparation for Honeybees (Apis mellifera L.)—An In Vitro Study
Source: MDPI journal article supplement (doi:10.3390/ani13061059), 2023-03-15
Supplement: s1 [file s1]

# Characterization and Protective Properties of Lactic Acid Bacteria Intended to Be Used in Probiotic Preparation for Honeybees (*Apis mellifera* L.)—An In Vitro Study

Aleksandra Leska, Adriana Nowak, Justyna Rosicka-Kaczmarek, Małgorzata Ryngajłło, Karolina Henryka Czarnecka-Chrebelska

**Table S4.** Impact of the cell-free culture supernatants (CFS) from lactic acid bacteria (LAB) strains on the viability of Caco-2 cells. Results are presented as mean (from 8 measurements)  $\pm$  standard deviation (SD). The effect of CFS from LAB on Caco-2 cell survival rate has been tested using the Kruskal–Wallis test (KW test), followed by a multiple comparison test (MCT) to indicate significant differences between the groups at  $p < 0.05$ . Statistical differences in Caco-2 survival between LAB in each CFS concentration are indicated with <sup>A–N</sup>.

| LAB strain                   | Concentration of CFSs                                                                                                                                   |                                                                                                                                                          |                                                                                                                                                                                                                              |                                                                                                                                                                                                                                                                                                                      |
|------------------------------|---------------------------------------------------------------------------------------------------------------------------------------------------------|----------------------------------------------------------------------------------------------------------------------------------------------------------|------------------------------------------------------------------------------------------------------------------------------------------------------------------------------------------------------------------------------|----------------------------------------------------------------------------------------------------------------------------------------------------------------------------------------------------------------------------------------------------------------------------------------------------------------------|
|                              | 1%                                                                                                                                                      | 5%                                                                                                                                                       | 10%                                                                                                                                                                                                                          | 20%                                                                                                                                                                                                                                                                                                                  |
| <i>A. kunkelii</i> DSM 12361 | 115.73 $\pm$ 7.75 <sup>A,B</sup>                                                                                                                        | 126.25 $\pm$ 13.72 <sup>A,B</sup>                                                                                                                        | 114.53 $\pm$ 11.86                                                                                                                                                                                                           | 78.72 $\pm$ 6.66 <sup>A,B,C,D</sup>                                                                                                                                                                                                                                                                                  |
| <i>P. acidilactici</i> 4/1   | 93.28 $\pm$ 7.2 <sup>A,C</sup>                                                                                                                          | 97.91 $\pm$ 10.03 <sup>A,C</sup>                                                                                                                         | 94.39 $\pm$ 7.12 <sup>A,B</sup>                                                                                                                                                                                              | 34.91 $\pm$ 10.46 <sup>E</sup>                                                                                                                                                                                                                                                                                       |
| <i>P. pentosaceus</i> 5/2    | 103.44 $\pm$ 9.44                                                                                                                                       | 109.30 $\pm$ 9.72                                                                                                                                        | 124.42 $\pm$ 6.71 <sup>A,C,D,E</sup>                                                                                                                                                                                         | 89.81 $\pm$ 8.74 <sup>E,F,G,H,I,J,K</sup>                                                                                                                                                                                                                                                                            |
| <i>P. pentosaceus</i> 7/1    | 101.65 $\pm$ 6.89 <sup>D</sup>                                                                                                                          | 116.65 $\pm$ 4.69 <sup>D</sup>                                                                                                                           | 100.24 $\pm$ 8.70 <sup>F</sup>                                                                                                                                                                                               | 45.80 $\pm$ 8.83                                                                                                                                                                                                                                                                                                     |
| <i>P. acidilactici</i> 11/3  | 105.68 $\pm$ 11.55                                                                                                                                      | 108.71 $\pm$ 6.88                                                                                                                                        | 91.12 $\pm$ 15.50 <sup>C,G</sup>                                                                                                                                                                                             | 29.80 $\pm$ 8.12 <sup>A,F,K</sup>                                                                                                                                                                                                                                                                                    |
| <i>P. pentosaceus</i> 14/1   | 97.50 $\pm$ 7.41 <sup>E</sup>                                                                                                                           | 112.16 $\pm$ 12.23                                                                                                                                       | 110.53 $\pm$ 10.05                                                                                                                                                                                                           | 36.58 $\pm$ 5.89                                                                                                                                                                                                                                                                                                     |
| <i>P. acidilactici</i> 18/1  | 101.08 $\pm$ 8.81 <sup>F</sup>                                                                                                                          | 108.00 $\pm$ 7.86 <sup>E</sup>                                                                                                                           | 94.49 $\pm$ 17.49 <sup>D,H</sup>                                                                                                                                                                                             | 30.26 $\pm$ 3.51 <sup>B,G,L</sup>                                                                                                                                                                                                                                                                                    |
| <i>P. acidilactici</i> 21/1  | 102.28 $\pm$ 5.66                                                                                                                                       | 109.54 $\pm$ 6.59                                                                                                                                        | 100.06 $\pm$ 9.62 <sup>I</sup>                                                                                                                                                                                               | 34.09 $\pm$ 3.08 <sup>H</sup>                                                                                                                                                                                                                                                                                        |
| <i>P. pentosaceus</i> 25/1   | 102.73 $\pm$ 7.82                                                                                                                                       | 101.47 $\pm$ 10.09 <sup>F</sup>                                                                                                                          | 107.60 $\pm$ 7.38                                                                                                                                                                                                            | 75.65 $\pm$ 15.12 <sup>K,L,M,N</sup>                                                                                                                                                                                                                                                                                 |
| <i>L. casei</i> 12AN         | 164.53 $\pm$ 17.88 <sup>C,D,E,F,G</sup>                                                                                                                 | 144.41 $\pm$ 10.29 <sup>C,E,F,G</sup>                                                                                                                    | 157.26 $\pm$ 24.80 <sup>B,F,G,H,I,J</sup>                                                                                                                                                                                    | 30.17 $\pm$ 3.48 <sup>C,I,M</sup>                                                                                                                                                                                                                                                                                    |
| <i>P. pentosaceus</i> OK-S   | 97.48 $\pm$ 6.31 <sup>B,G</sup>                                                                                                                         | 95.7 $\pm$ 7.55 <sup>B,D,G</sup>                                                                                                                         | 90.53 $\pm$ 20.46 <sup>E,J</sup>                                                                                                                                                                                             | 30.92 $\pm$ 5.05 <sup>D,J,N</sup>                                                                                                                                                                                                                                                                                    |
| <i>p</i> -values (KW test)   | <sup>A</sup> 0.0029; <sup>B</sup> 0.05;<br><sup>C</sup> 0.000; <sup>D</sup> 0.0351;<br><sup>E</sup> 0.0008; <sup>F</sup> 0.0077;<br><sup>G</sup> 0.0007 | <sup>A</sup> 0.0097; <sup>B</sup> 0.0026;<br><sup>C</sup> 0.000; <sup>D</sup> 0.0272;<br><sup>E</sup> 0.0426; <sup>F</sup> 0.0008;<br><sup>G</sup> 0.000 | <sup>A</sup> 0.0048; <sup>B</sup> 0.0002;<br><sup>C</sup> 0.0073; <sup>D</sup> 0.0351;<br><sup>E</sup> 0.0065; <sup>F</sup> 0.0137;<br><sup>G</sup> 0.0003; <sup>H</sup> 0.0021;<br><sup>I</sup> 0.0127; <sup>J</sup> 0.0003 | <sup>A</sup> 0.002; <sup>B</sup> 0.0066;<br><sup>C</sup> 0.0052; <sup>D</sup> 0.0062;<br><sup>E</sup> 0.0069; <sup>F</sup> 0.0001;<br><sup>G</sup> 0.0005; <sup>H</sup> 0.0303;<br><sup>I</sup> 0.0004; <sup>J</sup> 0.0005;<br><sup>K</sup> 0.0023; <sup>L</sup> 0.0074;<br><sup>M</sup> 0.0059; <sup>N</sup> 0.007 |
